# Supplementary material for: Methylation of FKBP5 and SLC6A4 in Relation to Treatment Response to Mindfulness Based Stress Reduction for Posttraumatic Stress Disorder
Source: Front Psychiatry. 2018 Sep 18;9:418. doi: 10.3389/fpsyt.2018.00418 (PMC6153325; doi:10.3389/fpsyt.2018.00418)
Supplement: Supplemental Table 2 — Adjusted means and 95% confidence intervals of methylation in FKBP5 intron 7 bin2 and CpG_35558513 before and after treatment in MBSR responders and nonresponders. [file Table_2.XLSX]

## Sheet: Sheet1
	Group	Time	Adjusted mean (S.E.)	95% Confidence Interval
FKBP5 intron 7 bin 2	Responders (N = 11)	Pre-treatment	0.817 (0.011)	0.794-0.839
		Post-treatment	0.834 (0.013)	0.808-0.861
	Non-responders (N = 11)	Pre-treatment	0.841 (0.011)	0.819-0.863
		Post-treatment	0.814 (0.013)	0.787-0.840
CpG_35558513	Responders (N = 11)	Pre-treatment	0.817 (0.017)	0.780-0.853
		Post-treatment	0.848 (0.018)	0.810-0.886
	Non-responders (N = 11)	Pre-treatment	0.853 (0.017)	0.817-0.889
		Post-treatment	0.824 (0.018)	0.786-0.863
